# Supplementary material for: Aggregation Induced Emission Enhancement of a fascinating Pyrene mediated fluorescent chromophore
Source: Research Square preprint supplement (doi:10.21203/rs.3.rs-6450767/v1), 2025-05-08
Supplement: Supplementary file 1 [file 3a7c6bf6b8b9727bbed91314.docx]

**Supplementary Material**

**Aggregation Induced Emission Enhancement of a fascinating Pyrene mediated fluorescent chromophore**

*Dr. Uttam Panda*a, Mr. Rajat Kumar Sahooa,*

*aDepartment of Chemistry, Balasore College of Engineering and Technology,Sergarh, Balasore–756060, Odisha, India (Affiliated to* Biju Patnaik University of Technology, Rourkela, Odisha)

*Corresponding e-mail: uttamju88@gmail.com*

**Supporting Information**

56.0

1758.06

1184.67

1719.35

1530.64

1583.87

54

52

50

48

46

44

%T

42

40

38

36

34

32

31.0

3500.0 3200 2800 2400 2000 1800 1600 1400 1200 1000 800 600 500.0

cm-1

**Fig.S1**. FT-IR spectrum of (NE,NE)-4,4’-methylenebis(N-(pyren-1-ylmethylene)aniline) (HL)


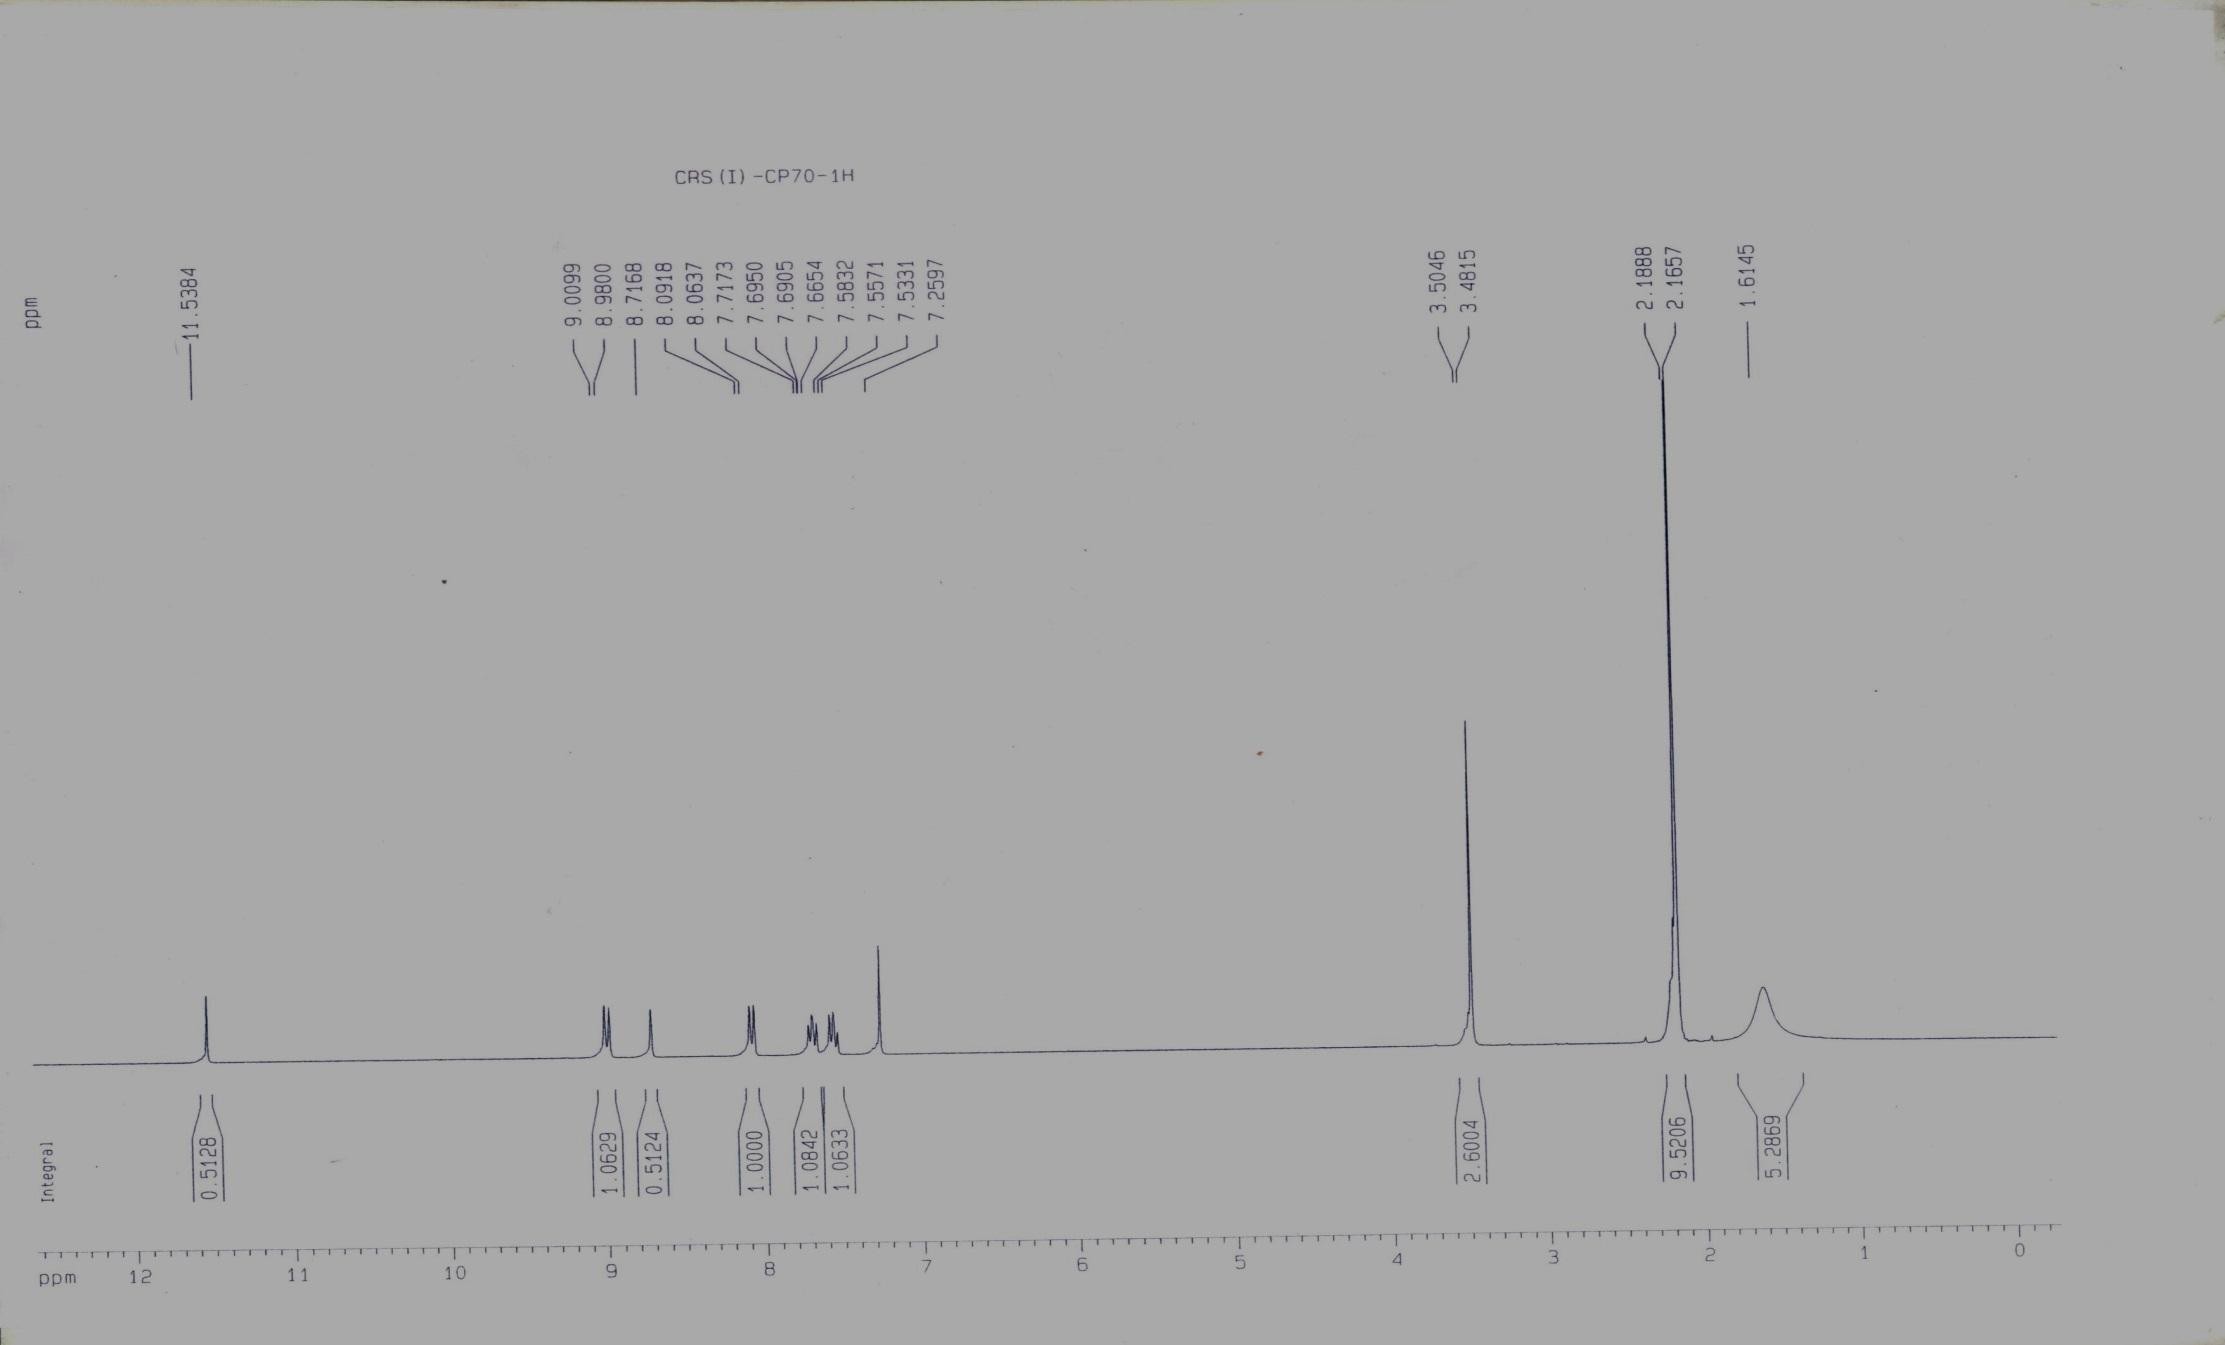

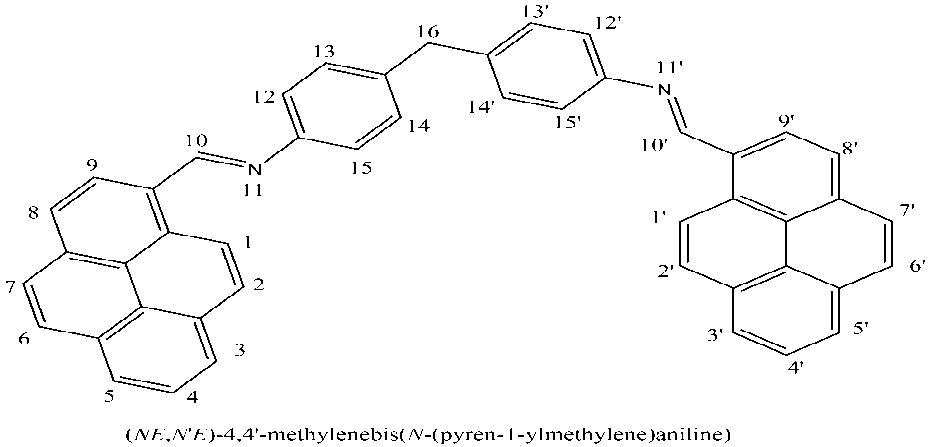

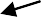

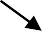

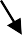


C-16

(C-10,C-10’) (C-13,14 & C-13’,14’) (C-3,4,5, & C-3’,4’,5’)

(C-12,15 & C-12’,15’) (C-6,7,1,2 & C-1’,2’,6’,7’’)

Fig.S2-1H NMR spectrum of (NE,NE)-4,4’-methylenebis(N-(pyren-1-ylmethylene)aniline) (L)


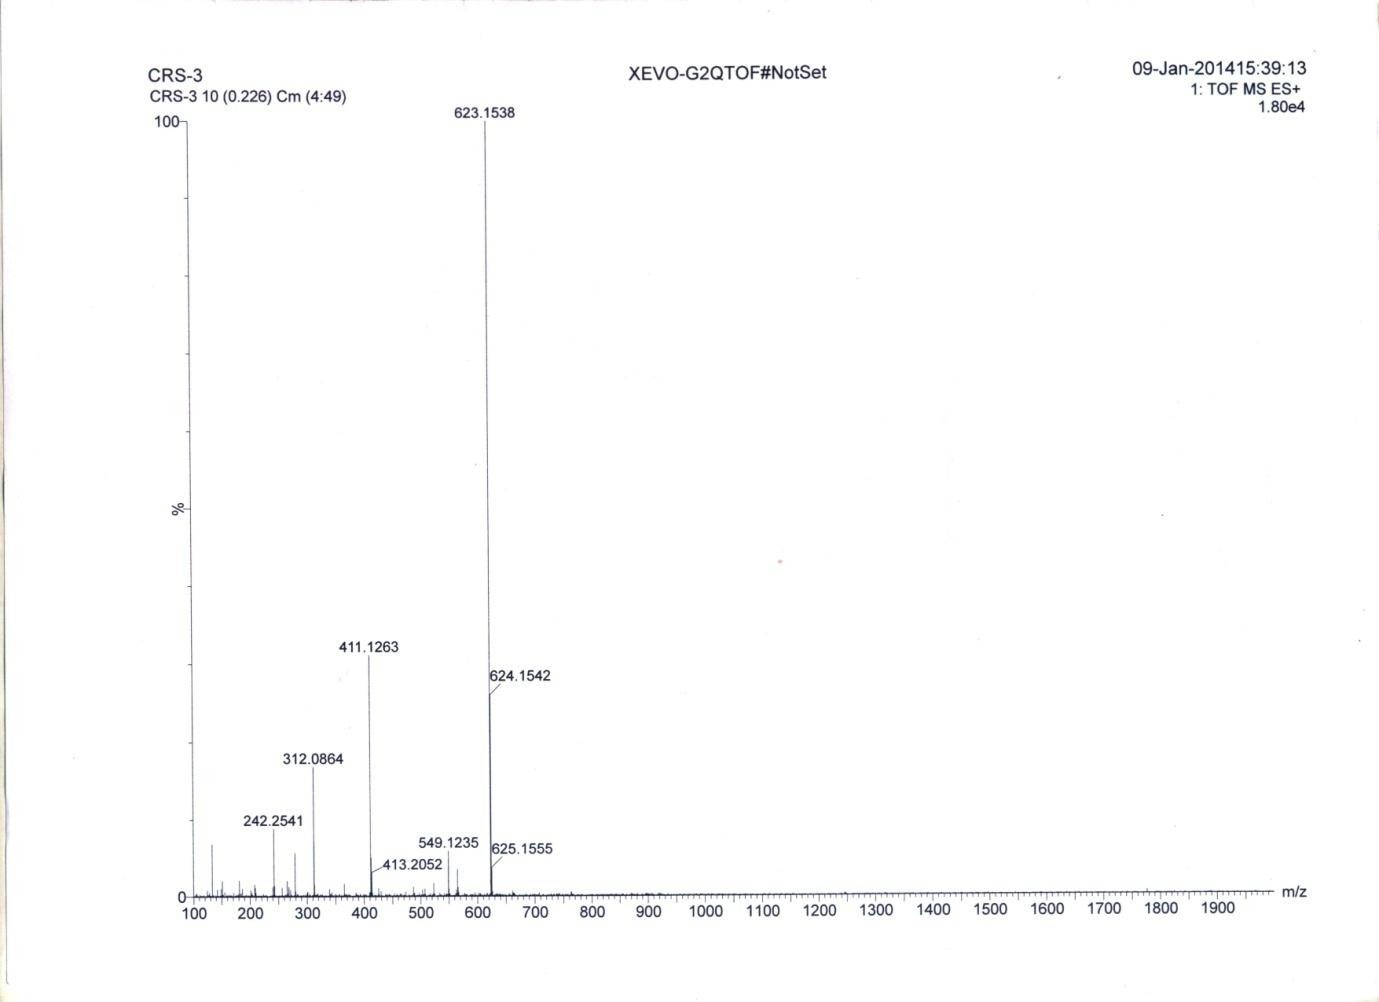

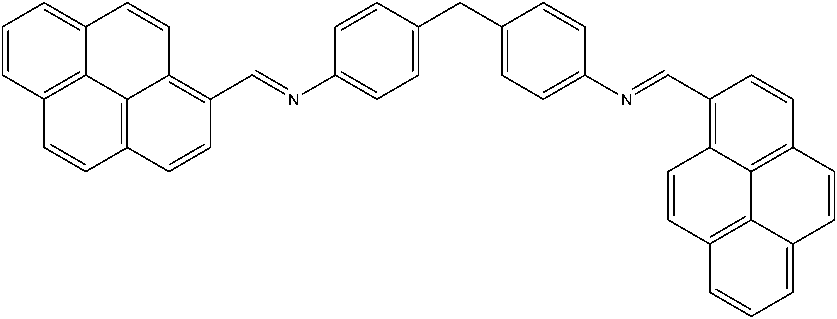


Fig. S3- Mass spectrum of (NE,NE)-4,4’-methylenebis(N-(pyren-1-ylmethylene)aniline) (HL)


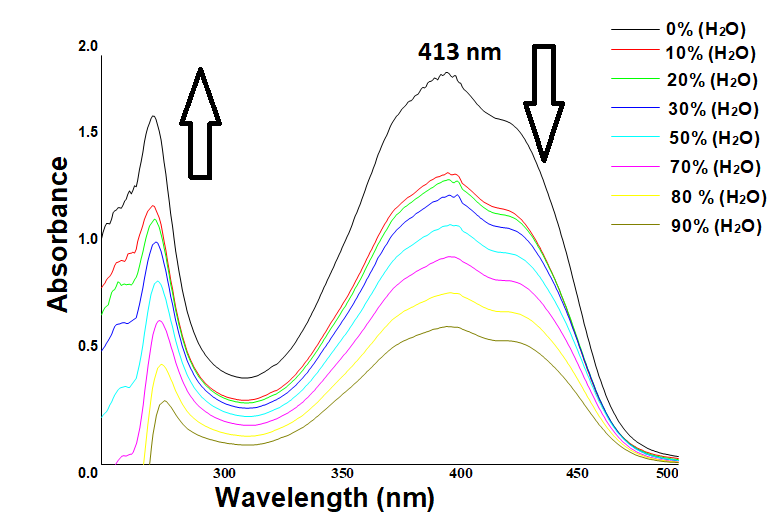


Fig.S4. UV-vis spectral change of (NE,NE)-4,4’-methylenebis(N-(pyren-1-ylmethylene)aniline) in THF upon gradual addition of water

Table 1

- Contour plots of some selected molecular orbitals of HL

| 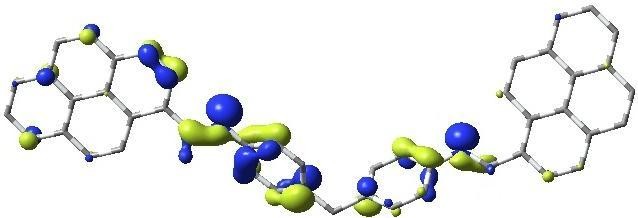 |
| --- |
| Homo-3; E, -6.22 eV; Pyrene, 31; imine, 29; biphenylethylene, 40% |
| 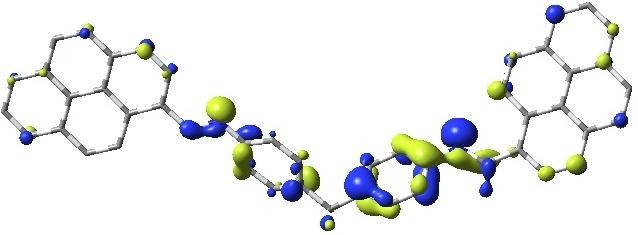 |
| Homo-2; E, -6.08 eV; Pyrene, 33; imine, 24; biphenylethylene, 43% |
| 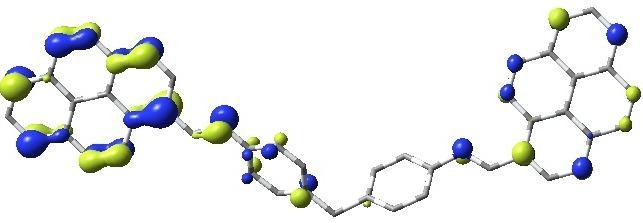 |
| Homo-1; E, -5.5 eV; Pyrene, 79; imine, 09; biphenylethylene, 12% |
| 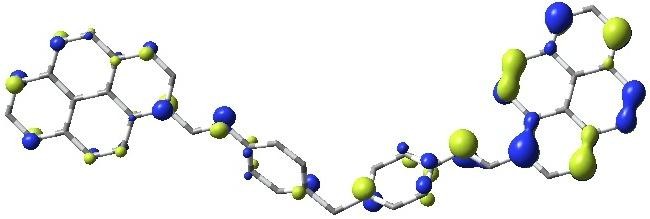 |
| Homo; E, -5.44 eV; Pyrene, 72; imine, 10; biphenylethylene, 18% |

| 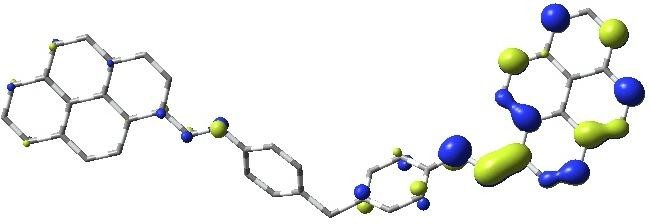 |
| --- |
| Lumo; E, -2.29 eV; Pyrene, 69; imine, 22; biphenylethylene, 09% |
| 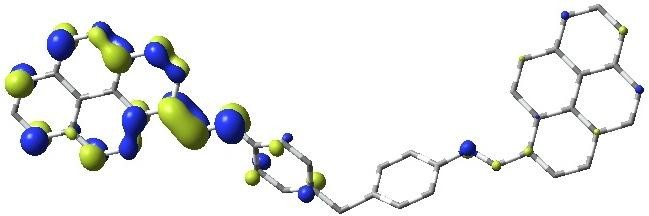 |
| Lumo+1; E, -2.27 eV; Pyrene, 68; imine, 22; biphenylethylene, 10% |
| 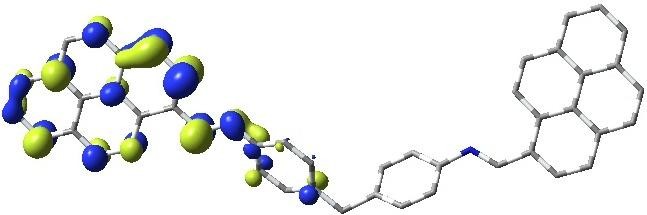 |
| Lumo+2; E, -1.22 eV; Pyrene, 72; imine, 17; biphenylethylene, 11% |
| 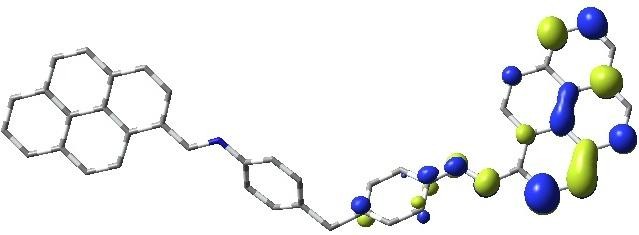 |
| Lumo+3; E, -1.05 eV; Pyrene, 82; imine, 09; biphenylethylene, 09% |

Table 2.

MO composition of HL

| MO | Energy  (eV) | pyrene | imine | biphenylethylene |
| --- | --- | --- | --- | --- |
| LUMO+6 | -0.45 | 24 | 01 | 75 |
| LUMO+5 | -0.72 | 67 | 14 | 19 |
| LUMO+4 | -0.82 | 85 | 06 | 09 |
| LUMO+3 | -1.05 | 82 | 09 | 09 |
| LUMO+2 | -1.22 | 72 | 17 | 11 |
| LUMO+1 | -2.27 | 68 | 22 | 10 |
| LUMO | -2.29 | 69 | 22 | 09 |
| HOMO | -5.44 | 72 | 10 | 18 |
| HOMO-1 | -5.5 | 79 | 09 | 12 |
| HOMO-2 | -6.08 | 33 | 24 | 43 |
| HOMO-3 | -6.22 | 31 | 29 | 40 |
| HOMO-4 | -6.54 | 86 | 09 | 05 |
| HOMO-5 | -6.55 | 88 | 08 | 04 |

TD-DFT data of HL in THF

Table 3.

IPCT: Interpyrene charge transfer; BPCT: Biphenylethylene to pyrene charge transfer; PBCT: Pyrene to biphenylethylene charge transfer

| Excitation energy(ev) | Wavelength(nm  ) | f | Key Transitions | Character |
| --- | --- | --- | --- | --- |
| 2.8170 | 440.14 | 1.5512 | (60%) HOMO → LUMO | IPCT |
| 2.9099 | 426.08 | 0.4794 | (68%) HOMO →  LUMO+1 | IPCT |
| 2.9811 | 415.91 | 0.0660 | (70%) HOMO-1 →  LUMO | IPCT |
| 3.0197 | 410.59 | 0.0862 | (82%) HOMO-1 →  LUMO+1 | IPCT |
| 3.2602 | 380.30 | 0.0784 | (61%) HOMO-2 →  LUMO | IPCT, BPCT |
| 3.3196 | 373.49 | 0.0202 | (41%) HOMO-2 →  LUMO+1 | IPCT, BPCT |
| 3.5378 | 350.46 | 0.0441 | (51%) HOMO-4 →  LUMO+1 | IPCT |
| 3.9234 | 316.01 | 0.0957 | (37%) HOMO →  LUMO+2 | IPCT |
| 4.0782 | 304.01 | 0.0608 | (40%) HOMO-1→ LUMO+2  (36%) HOMO→  LUMO+2 | IPCT IPCT |
| 4.1249 | 300.58 | 0.0605 | (54%) HOMO-5 →  LUMO+1 | IPCT |
| 4.1705 | 297.29 | 0.4589 | (19%) HOMO →  LUMO+3 | IPCT |
| 4.1807 | 296.57 | 0.1920 | (19%) HOMO →  LUMO+3 | IPCT |
| 4.2450 | 292.07 | 0.0632 | (62%) HOMO-1 →  LUMO+3 | IPCT |
| 4.5111 | 274.84 | 0.0496 | (39%) HOMO-1 →  LUMO+4 | IPCT |
| 4.5996 | 269.55 | 0.0721 | (63%) HOMO →  LUMO+6 | PBCT |
| 4.7774 | 259.52 | 0.0750 | (37%) HOMO-2 →  LUMO+5 | IPCT, BPCT |
| 4.9535 | 250.29 | 0.1067 | (28%) HOMO-2 →  LUMO+4 | IPCT, BPCT |
| 5.0994 | 243.14 | 0.0931 | (42%) HOMO-5 →  LUMO+3 | IPCT |
| 5.4212 | 228.70 | 0.7059 | (48%) HOMO-4 →  LUMO+4 | IPCT |

.
